# Supplementary material
Source: publisher figshare collection journal article supplement (https://frontiersin.figshare.com/ndownloader/files/24531317)
Supplement: Supplementary file 1 [file 24531317]

# Supplementary Material: Pore Network Modeling of Core Forming Melts in Planetesimals

Giulio F.D. Solferino, Paul-Ross Thomson\*, and Saswata Hier-Majumder

*Department of Earth Sciences, Royal Holloway University of London, Egham, Surrey, TW20 0EX, UK*

Correspondence\*:

Paul-Ross Thomson

Paul-Ross.Thomson.2016@live.rhul.ac.uk

## 1 MODEL OF MELT SEGREGATION

During liquid phase sintering of partially molten aggregates, the distribution of melt within a unit volume is controlled by the conservation of mass, momentum, energy, and entropy (Takei and Hier-Majumder, 2009; Sramek et al., 2006). The governing partial differential equations are nonlinear in nature. A number of previous works have studied the numerical solutions to these nonlinear equations and analytical solutions to linearized versions of the governing equations (Bercovici et al., 2001; Ricard et al., 2001; Hier-Majumder et al., 2006; Takei and Hier-Majumder, 2009). We refer the interested reader to these studies for a detailed analysis of the derivation and solution of the governing equations. In this work, we focus on analytical solutions to the linearized equations to explain the experimental observations, similar to the work of King et al. (2011).

The analytical solutions to the governing equations are built using marginal stability analysis. In this analysis, we express the melt fraction in the subsample as a sum of a base state,  $\phi_0$  and a perturbed state with a wave number  $k$  and a complex growth rate  $\lambda$ , expressed as,

$$\phi(x, t) = \phi_0 + \epsilon \tilde{\phi} e^{-ikx + \lambda t}, \quad (1)$$

where  $\tilde{\phi}$  is a constant amplitude of perturbation,  $x$  is length, and  $t$  is time, and  $\epsilon \ll 1$  is a constant coefficient of perturbation. The growth or decay of small perturbations is controlled by  $\lambda$ .

Hier-Majumder et al. (2006) demonstrated that the wetting behavior of the solid-melt, characterized by the dihedral angle at the melt located in grain triple junctions, controls the nature of growth of the perturbations. In wetting melt-solid aggregates, such as olivine and basalt samples (dihedral angle around  $30^\circ$ , Takei and Hier-Majumder, 2009), surface tension drives melt away from high to low concentrations, a mechanism named as homogenization (Hier-Majumder et al., 2006). King et al. (2011) and Parsons et al. (2008) demonstrated this phenomenon from experimentally annealed synthetic aggregates of olivine and basalt, where the rock was first deformed to create melt-rich bands and then annealed to observe melt moving away from bands. In non-wetting sulfide-olivine melts, the opposite behavior is expected, as the strong surface tension of sulfide melts induce a flow of the melt into pockets of high melt concentration. This behavior is sometimes called self-segregation Hier-Majumder et al. (2006).

In the absence of deformation, the growth or decay of perturbations in melt fraction is controlled by the mechanism of dissolution-precipitation. The growth rate during dissolution precipitation is given by

(equation 38, Takei and Hier-Majumder, 2009),  $k^2$

$$\lambda = -\frac{1}{\mathcal{P}e} \left( \frac{Wb\phi_o^{-1/2}}{1 - Wb\phi_o^{-1/2}} \right), \quad (2)$$

where  $\mathcal{P}e$  is the dimensionless Peclet number, and  $W$  and  $b$  are constants. These quantities are defined as,

$$\mathcal{P}e = \frac{vL}{D}, \quad W = \frac{\gamma\Omega}{dE}, \quad b = \frac{c_0}{2(1 - c_0)} f(\theta), \quad (3)$$

where  $f(\theta)$  is a function of the dihedral angle (Takei and Hier-Majumder, 2009, equation 7), and the definition and values of the remaining constants are described in Table 1. The characteristic velocity of melt is considered to be  $1\mu\text{m}/10\text{ hr}$ , a conservative estimate of the velocity of melt segregation, compared to the length of our experiments and the studies of King et al. (2011).

We use the growth rate from equation (2) using the constants listed in the table, to determine the enrichment in the melt fraction defined as,

$$\Delta\phi = \frac{\Delta\phi_t}{\Delta\phi_0}, \quad (4)$$

where the numerator is the difference between maximum melt fraction and minimum melt fraction at time  $t$  and the denominator is the difference between maximum and minimum melt fraction at the beginning of the annealing experiment (King et al., 2011).

| Variable | Definition                              | Value                                              |
|----------|-----------------------------------------|----------------------------------------------------|
| $v$      | velocity of melt                        | $2.78 \times 10^{-11} \text{ms}^{-1} *$            |
| $L$      | length scale of subvolume               | $7 \times 10^{-4} \text{ m} *$                     |
| $D$      | diffusivity                             | $5 \times 10^{-11} \text{ m}^2\text{s}^{-1} a$     |
| $\gamma$ | surface tension                         | $1 \text{ Jm}^{-2} *$                              |
| $\Omega$ | molar volume of Fe                      | $7.09 \times 10^{-6} \text{ m}^3\text{mol}^{-1} a$ |
| $d$      | grain size                              | $10 - 50 \mu\text{m} c$                            |
| $E$      | activation energy of reaction           | $1.2 \times 10^4 \text{ Jmol}^{-1} a$              |
| $c_0$    | initial concentration of Fe in the melt | $0.7 c$                                            |

Sources:  $*$  This study,  $a$  Takei and Hier-Majumder (2009),  $b$  Robie and Bethke (1962),  $c$  Solferino and Golabek (2018).

**Table 1.** Table of constants used in the calculation of growth rate of linear perturbations.

## 2 DATA TABLE

This data table contains the total and connected melt fractions and threshold range of the image sub-volumes.

| Sample | Total Volume Fraction<br>Melt Distribution | Connected Volume Fraction<br>Melt Distribution | Threshold Range |
|--------|--------------------------------------------|------------------------------------------------|-----------------|
|--------|--------------------------------------------|------------------------------------------------|-----------------|

|          | (%)          | (%)   |               |
|----------|--------------|-------|---------------|
| FS9010-1 | Sub-Volume-1 | 19.68 | 19.18 128-255 |
|          | Sub-Volume-2 | 20.09 | 19.64 128-255 |
|          | Sub-Volume-3 | 20.40 | 19.99 128-255 |
|          | Sub-Volume-4 | 18.97 | 18.44 128-255 |
|          | Sub-Volume-5 | 19.13 | 18.64 128-255 |
|          | Sub-Volume-6 | 19.66 | 19.18 128-255 |
| FS9010-4 | Sub-Volume-1 | 15.95 | 7.32 124-255  |
|          | Sub-Volume-2 | 15.47 | 2.92 124-255  |
|          | Sub-Volume-3 | 16.11 | 5.61 124-255  |
|          | Sub-Volume-4 | 16.39 | 6.79 124-255  |
|          | Sub-Volume-5 | 17.20 | 8.5 124-255   |
|          | Sub-Volume-6 | 16.85 | 7.34 124-255  |
| FS9010-5 | Sub-Volume-1 | 17.38 | 7.78 116-255  |
|          | Sub-Volume-2 | 18.84 | 9.32 116-255  |
|          | Sub-Volume-3 | 17.09 | 5.95 116-255  |
|          | Sub-Volume-4 | 18.46 | 6.7 116-255   |
|          | Sub-Volume-5 | 16.88 | 0.0 116-255   |
|          | Sub-Volume-6 | 16.53 | 1.84 116-255  |
| OFS-3    | Sub-Volume-1 | 28.32 | 28.28 113-255 |
|          | Sub-Volume-2 | 22.89 | 22.86 113-255 |
|          | Sub-Volume-3 | 26.16 | 26.13 113-255 |
|          | Sub-Volume-4 | 25.75 | 25.66 113-255 |
|          | Sub-Volume-5 | 21.07 | 21.02 113-255 |
|          | Sub-Volume-6 | 39.38 | 39.37 113-255 |
| OFS-4    | Sub-Volume-1 | 3.95  | 0.0 130-255   |
|          | Sub-Volume-2 | 5.26  | 0.0 130-255   |
|          | Sub-Volume-3 | 5.45  | 0.0 130-255   |
|          | Sub-Volume-4 | 4.21  | 0.0 130-255   |
|          | Sub-Volume-5 | 6.01  | 0.0 130-255   |
|          | Sub-Volume-6 | 4.92  | 0.0 130-255   |
| OFS-5    | Sub-Volume-1 | 15.59 | 15.39 138-255 |
|          | Sub-Volume-2 | 13.81 | 13.67 138-255 |
|          | Sub-Volume-3 | 14.64 | 14.54 138-255 |
|          | Sub-Volume-4 | 15.62 | 15.5 138-255  |
|          | Sub-Volume-5 | 15.70 | 15.57 138-255 |
|          | Sub-Volume-6 | 15.5  | 15.41 138-255 |
| OFS-9    | Sub-Volume-1 | 14.96 | 14.15 85-255  |
|          | Sub-Volume-2 | 24.13 | 23.78 85-255  |
|          | Sub-Volume-3 | 20.58 | 20.13 85-255  |
|          | Sub-Volume-4 | 21.46 | 21.21 85-255  |
|          | Sub-Volume-5 | 20.72 | 20.43 85-255  |

|        |              |       |       |         |
|--------|--------------|-------|-------|---------|
|        | Sub-Volume-6 | 23.58 | 23.38 | 85–255  |
|        | Sub-Volume-1 | 20.97 | 20.85 | 82–255  |
|        | Sub-Volume-2 | 19.11 | 18.9  | 82–255  |
| OFS-10 | Sub-Volume-3 | 19.92 | 19.79 | 82–255  |
|        | Sub-Volume-4 | 21.95 | 21.92 | 82–255  |
|        | Sub-Volume-5 | 19.42 | 19.33 | 82–255  |
|        | Sub-Volume-6 | 21.92 | 21.78 | 82–255  |
|        | Sub-Volume-1 | 17.91 | 14.45 | 146–255 |
|        | Sub-Volume-2 | 17.43 | 14.82 | 146–255 |
| OFS-11 | Sub-Volume-3 | 18.38 | 16.62 | 146–255 |
|        | Sub-Volume-4 | 17.36 | 15.09 | 146–255 |
|        | Sub-Volume-5 | 17.73 | 15.73 | 146–255 |
|        | Sub-Volume-6 | 18.30 | 16.07 | 146–255 |
|        | Sub-Volume-1 | 38.43 | 38.4  | 132–255 |
|        | Sub-Volume-2 | 38.24 | 38.2  | 132–255 |
| OFS-15 | Sub-Volume-3 | 43.9  | 43.89 | 132–255 |
|        | Sub-Volume-4 | 47.48 | 47.47 | 132–255 |
|        | Sub-Volume-5 | 45.15 | 45.13 | 132–255 |
|        | Sub-Volume-6 | 43.94 | 43.92 | 132–255 |
|        | Sub-Volume-1 | 29.8  | 29.79 | 120–255 |
|        | Sub-Volume-2 | 30.77 | 30.75 | 120–255 |
| OFS-16 | Sub-Volume-3 | 29.66 | 29.56 | 120–255 |
|        | Sub-Volume-4 | 31.09 | 31.04 | 120–255 |
|        | Sub-Volume-5 | 31.12 | 31.09 | 120–255 |
|        | Sub-Volume-6 | 32.06 | 32.06 | 120–255 |

Table 2 Results of melt distribution volume calculation. Segmented using Interactive (manual) thresholding.

## REFERENCES

- Bercovici, D., Ricard, Y., and Schubert, G. (2001). A two-phase model for compaction and damage; 1, General theory. *Journal of Geophysical Research, B, Solid Earth and Planets* 106, 8887–8906
- Hier-Majumder, S., Ricard, Y., and Bercovici, D. (2006). Role of grain boundaries in magma migration and storage. *Earth and Planetary Science Letters* 248, 735–749. doi:{10.1016/j.epsl.2006.06.015}
- King, D. S. H., Hier-Majumder, S., and Kohlstedt, D. L. (2011). An experimental study of the effects of surface tension in homogenizing perturbations in melt fraction. *Earth and Planetary Science Letters* 307, 735–749. doi:doi:10.1016/j.epsl.2011.05.009
- Parsons, R. A., Nimmo, F., Hustoft, J. W., Holtzman, B. K., and Kohlstedt, D. L. (2008). An experimental and numerical study of surface tension-driven melt flow. *Earth and Planetary Science Letters* 267, 548–557
- Ricard, Y., Bercovici, D., and Schubert, G. (2001). A two-phase model for compaction and damage; 2, Applications to compaction, deformation, and the role of interfacial surface tension. *Journal of Geophysical Research, B, Solid Earth and Planets* 106, 8907–8924
- Robie, R. A. and Bethke, P. M. (1962). *Molar Volumes and Densities of Minerals*. Tech. rep., USGS

- Solferino, G. F. and Golabek, G. J. (2018). Olivine grain growth in partially molten Fe–Ni–S: A proxy for the genesis of pallasite meteorites. *Earth and Planetary Science Letters* 504, 38–52. doi:10.1016/j.epsl.2018.09.027
- Sramek, Ricard, Y., and Bercovici, D. (2006). Simultaneous melting and compaction in deformable two-phase media. *Geophysical Journal International* 168, 964–982
- Takei, Y. and Hier-Majumder, S. (2009). A generalized formulation of interfacial tension driven fluid migration with dissolution/precipitation. *Earth and Planetary Science Letters* 288, 138–148. doi:{10.1016/j.epsl.2009.09.016}
